# Supplementary material for: PERSonality, Ehical, and PROfessional Quality of Life in Pediatric/Adult Intensive Nurses Study: PERSEPRO PAIN Study
Source: Research Square preprint supplement (doi:10.21203/rs.3.rs-144202/v1), 2021-01-15
Supplement: Supplementary file 1 [file 68aff2e5c78c6e14a453b321.pdf]

Online Data Supplement 1: Result of univariate analysis for BOS,STS,CS

Title: PERSONality, Ethical, and PROfessional quality of life in Pediatric/Adult Intensive Nurses study: PERSEPRO PAIN study

Running title: PERSEPRO PAIN study

Yujiro Matsuishi<sup>1,2†</sup>, Bryan J. Mathis<sup>3†</sup>, Haruhiko Hoshino<sup>1,2</sup>, Yuki Enomoto<sup>1,4</sup>, Nobutake Shimojo<sup>1</sup>, Satoru Kawano<sup>1</sup>, Hideaki Sakuramoto<sup>5</sup>, Yoshiaki Inoue<sup>1</sup>

1Department of Emergency and Critical Care Medicine, Faculty of Medicine, University of Tsukuba, Tsukuba, Ibaraki, Japan.

2Pediatric Intensive Care Unit, University of Tsukuba Hospital, Tsukuba, Ibaraki, Japan.

3Medical English Communication Center, Faculty of Medicine, University of Tsukuba, Tsukuba, Ibaraki, Japan.

4University of Tsukuba Hospital, Department of Pediatrics, Tsukuba, Ibaraki, Japan.

5Adult Health Nursing, College of Nursing, Ibaraki Christian University, Hitachi, Ibaraki, Japan

†These authors contributed equally to this study.

Age for BOS, STS, CS

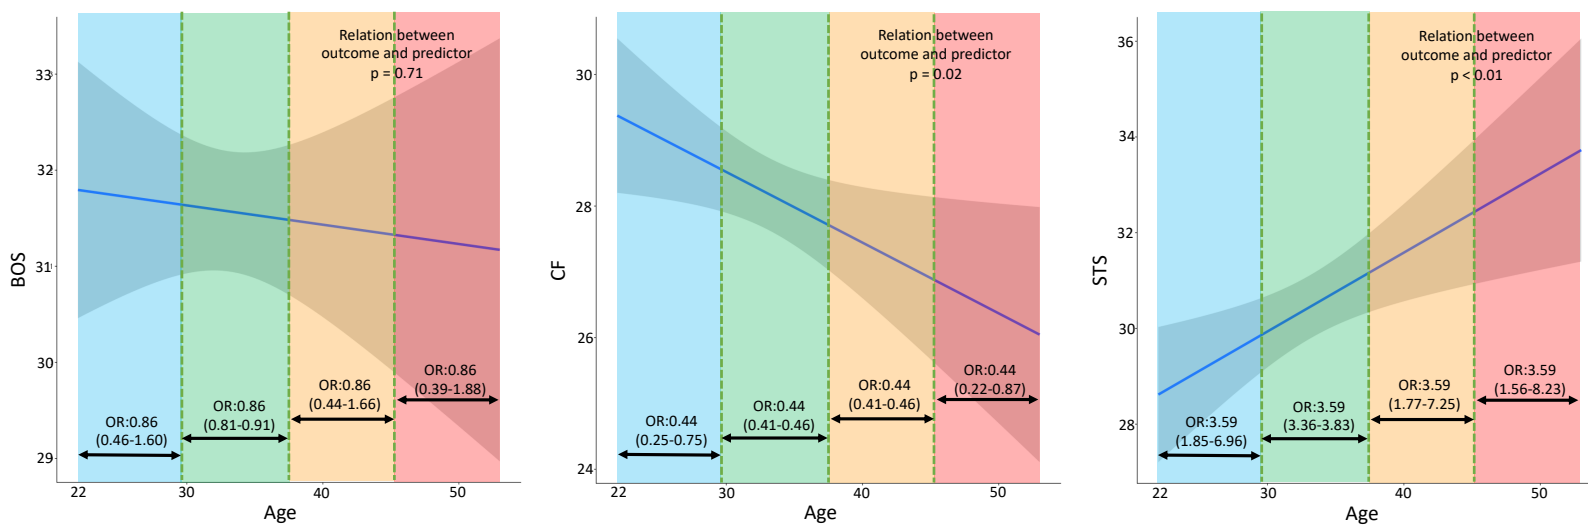

Age for BOS

| Quartile                            | Range of factor | Odds ratio | 95% CI      |
|-------------------------------------|-----------------|------------|-------------|
| 0 <sup>th</sup> -25 <sup>th</sup>   | 22-30           | 0.86       | (0.46-1.60) |
| 25 <sup>th</sup> -50 <sup>th</sup>  | 30-38           | 0.86       | (0.81-0.91) |
| 50 <sup>th</sup> -75 <sup>th</sup>  | 38-45           | 0.86       | (0.44-1.66) |
| 75 <sup>th</sup> -100 <sup>th</sup> | 45-53           | 0.86       | (0.39-1.88) |

Age for STS

| Quartile                            | Range of factor | Odds ratio | 95% CI      |
|-------------------------------------|-----------------|------------|-------------|
| 0 <sup>th</sup> -25 <sup>th</sup>   | 22-30           | 0.44       | (0.25-0.75) |
| 25 <sup>th</sup> -50 <sup>th</sup>  | 30-38           | 0.44       | (0.41-0.46) |
| 50 <sup>th</sup> -75 <sup>th</sup>  | 38-45           | 0.44       | (0.41-0.46) |
| 75 <sup>th</sup> -100 <sup>th</sup> | 45-53           | 0.44       | (0.22-0.87) |

Age for CS

| Quartile                            | Range of factor | Odds ratio | 95% CI      |
|-------------------------------------|-----------------|------------|-------------|
| 0 <sup>th</sup> -25 <sup>th</sup>   | 22-30           | 3.59       | (1.85-6.96) |
| 25 <sup>th</sup> -50 <sup>th</sup>  | 30-38           | 3.59       | (3.36-3.83) |
| 50 <sup>th</sup> -75 <sup>th</sup>  | 38-45           | 3.59       | (1.77-7.25) |
| 75 <sup>th</sup> -100 <sup>th</sup> | 45-53           | 3.59       | (1.56-8.23) |

Sex for BOS, STS, CS

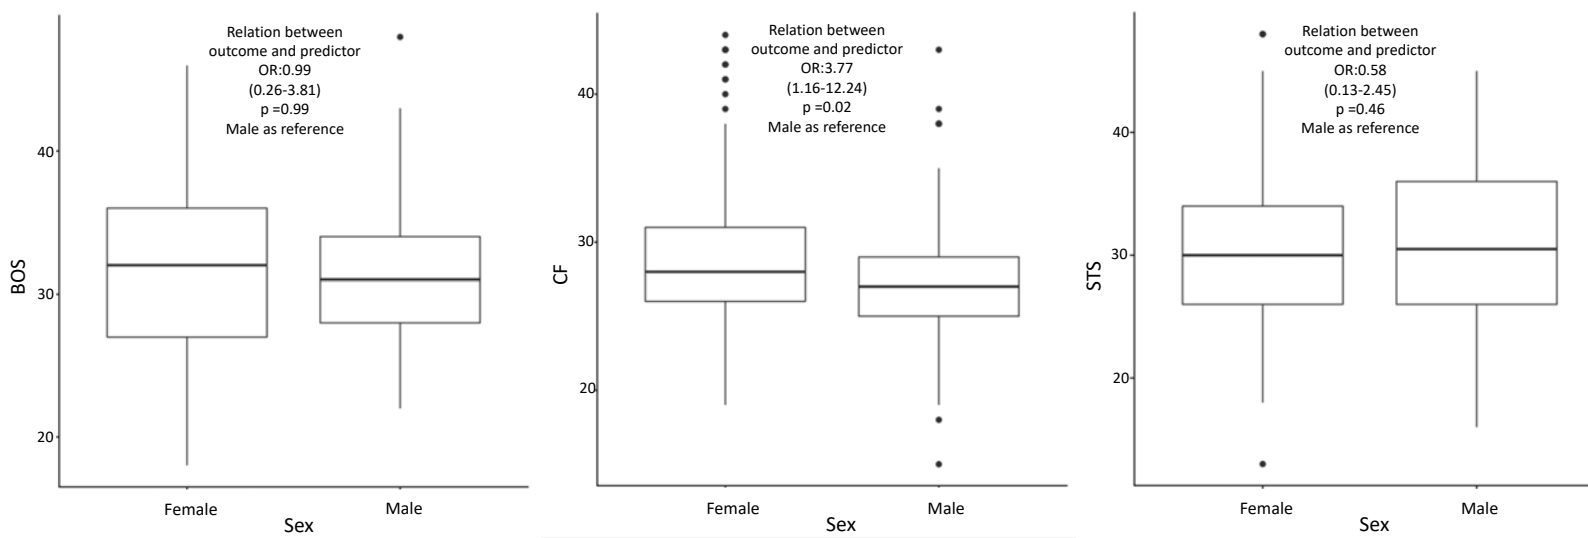

Sex for BOS

| Reference | Factor | Odds ratio | 95%CI       | p-value |
|-----------|--------|------------|-------------|---------|
| male      | female | 0.99       | (0.26-3.36) | 0.99    |

Sex for STS

| Reference | Factor | Odds ratio | 95%CI        | p-value |
|-----------|--------|------------|--------------|---------|
| male      | female | 3.77       | (1.16-12.24) | 0.02    |

Sex for CS

| Reference | Factor | Odds ratio | 95%CI       | p-value |
|-----------|--------|------------|-------------|---------|
| male      | female | 0.58       | (0.13-2.45) | 0.46    |

Marital status for BOS, STS, CS

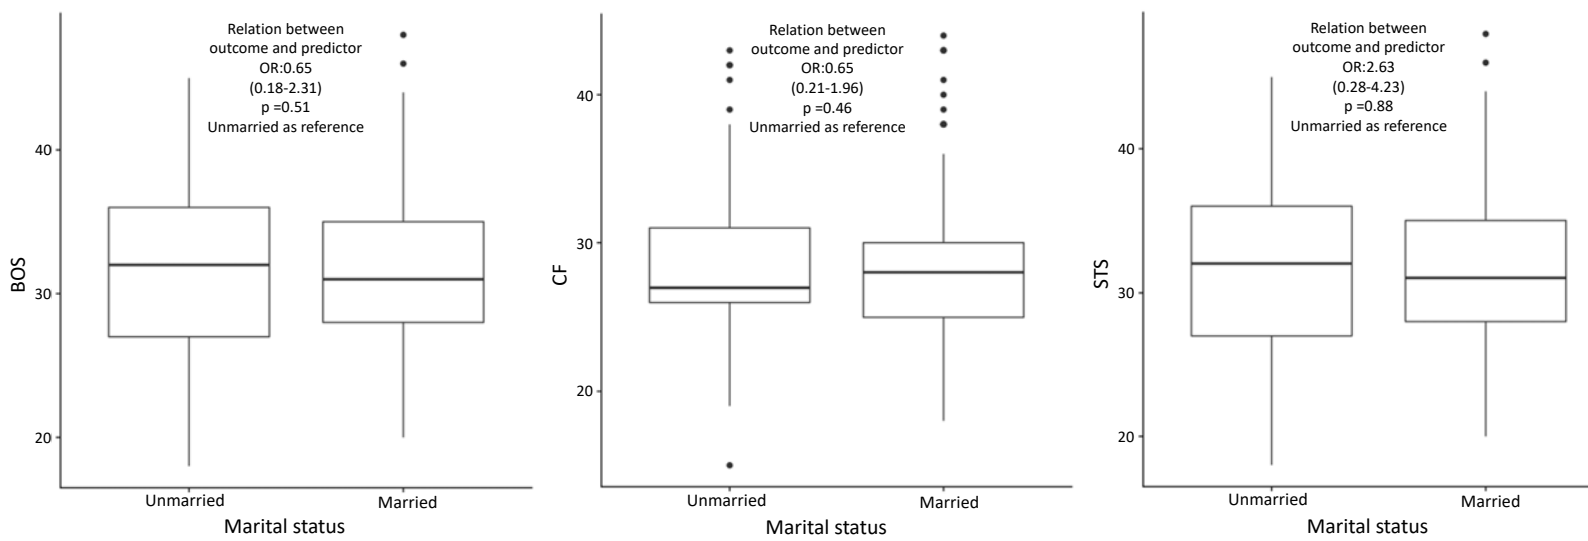

Marital status for BOS

| Reference | Factor  | Odds ratio | 95%CI       | p-value |
|-----------|---------|------------|-------------|---------|
| unmarried | married | 0.65       | (0.18-2.31) | 0.51    |

Marital status for STS

| Reference | Factor  | Odds ratio | 95%CI       | p-value |
|-----------|---------|------------|-------------|---------|
| unmarried | married | 0.98       | (0.21-1.96) | 0.46    |

Marital status for CS

| Reference | Factor  | Odds ratio | 95%CI       | p-value |
|-----------|---------|------------|-------------|---------|
| unmarried | married | 2.63       | (0.28-4.23) | 0.88    |



Children for BOS, STS, CS

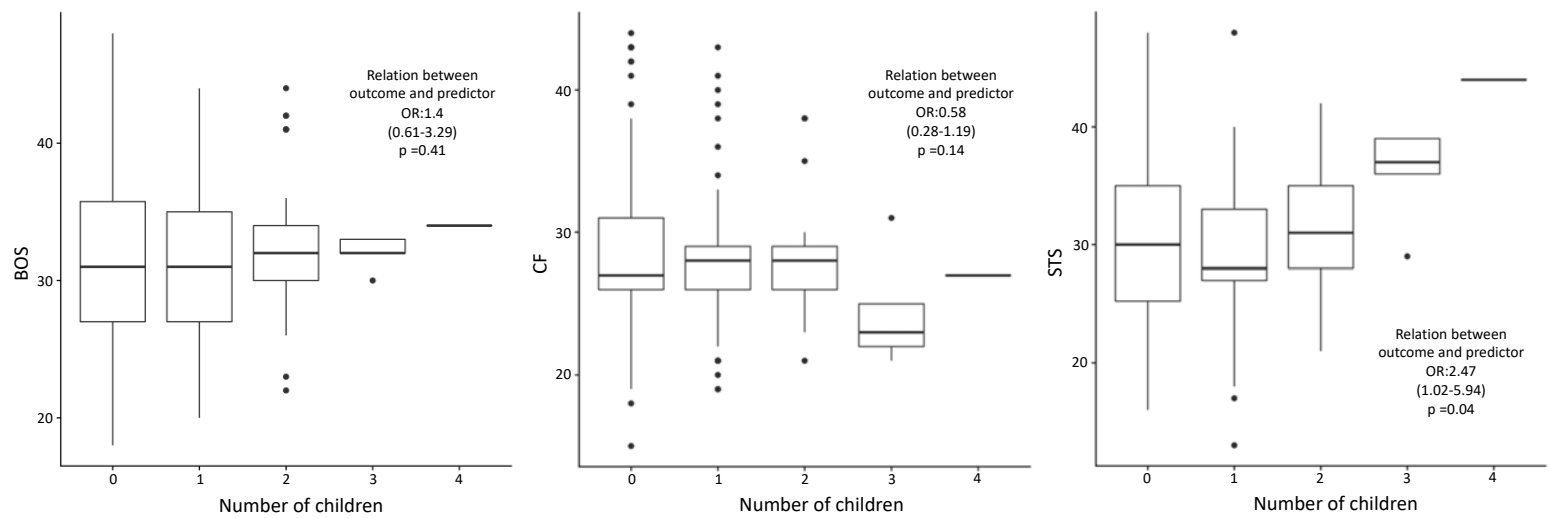

Children for BOS

| Reference | Factor            | Odds ratio | 95%CI       | p-value |
|-----------|-------------------|------------|-------------|---------|
| Not have  | Numberof children | 1.4        | (0.61-3.29) | 0.41    |

Children for STS

| Reference | Factor            | Odds ratio | 95%CI       | p-value |
|-----------|-------------------|------------|-------------|---------|
| Not have  | Numberof children | 0.58       | (0.28-1.19) | 0.14    |

Children for CS

| Reference | Factor            | Odds ratio | 95%CI       | p-value |
|-----------|-------------------|------------|-------------|---------|
| Not have  | Numberof children | 2.47       | (1.02-5.94) | 0.04    |

Hobby for BOS, STS, CS

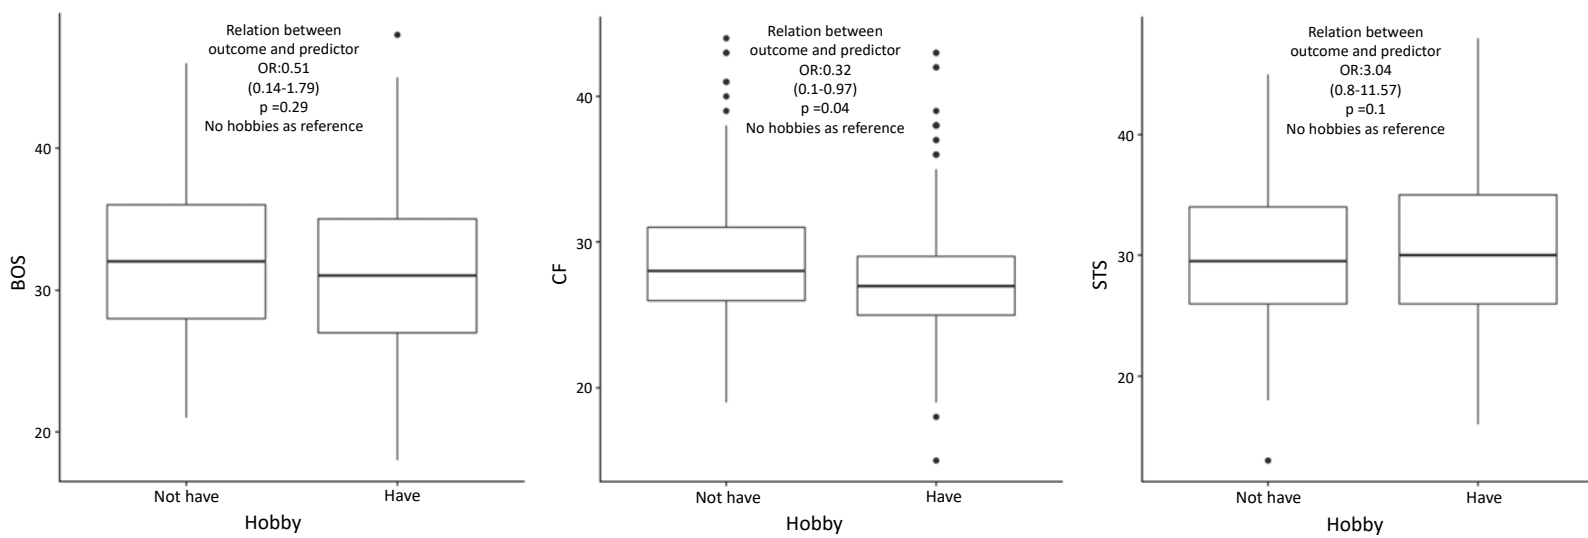

Hobby for BOS

| Reference  | Factor       | Odds ratio | 95%CI       | p-value |
|------------|--------------|------------|-------------|---------|
| No hobbies | Having hobby | 0.51       | (0.14-1.79) | 0.29    |

Hobby for STS

| Reference  | Factor       | Odds ratio | 95%CI      | p-value |
|------------|--------------|------------|------------|---------|
| No hobbies | Having hobby | 0.32       | (0.1-0.97) | 0.04    |

Hobby for CS

| Reference  | Factor       | Odds ratio | 95%CI       | p-value |
|------------|--------------|------------|-------------|---------|
| No hobbies | Having hobby | 3.04       | (0.8-11.57) | 0.1     |

Exercise for BOS, STS, CS

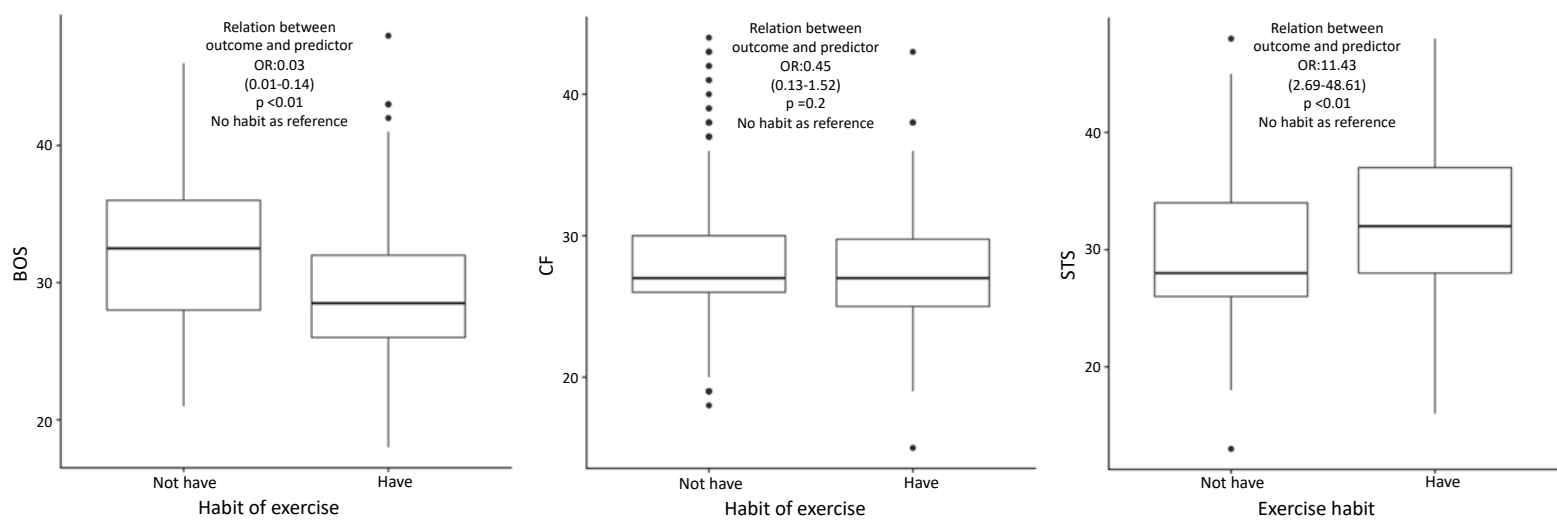

Exercise for BOS

| Reference | Factor | Odds ratio | 95%CI       | p-value |
|-----------|--------|------------|-------------|---------|
| No habit  | Habit  | 0.03       | (0.01-0.14) | >0.01   |

Exercise for STS

| Reference | Factor | Odds ratio | 95%CI       | p-value |
|-----------|--------|------------|-------------|---------|
| No habit  | Habit  | 0.45       | (0.13-1.52) | 0.2     |

Exercise for STS

| Reference | Factor | Odds ratio | 95%CI        | p-value |
|-----------|--------|------------|--------------|---------|
| No habit  | Habit  | 11.43      | (2.69-48.61) | >0.01   |

Annual income for BOS, STS, CS

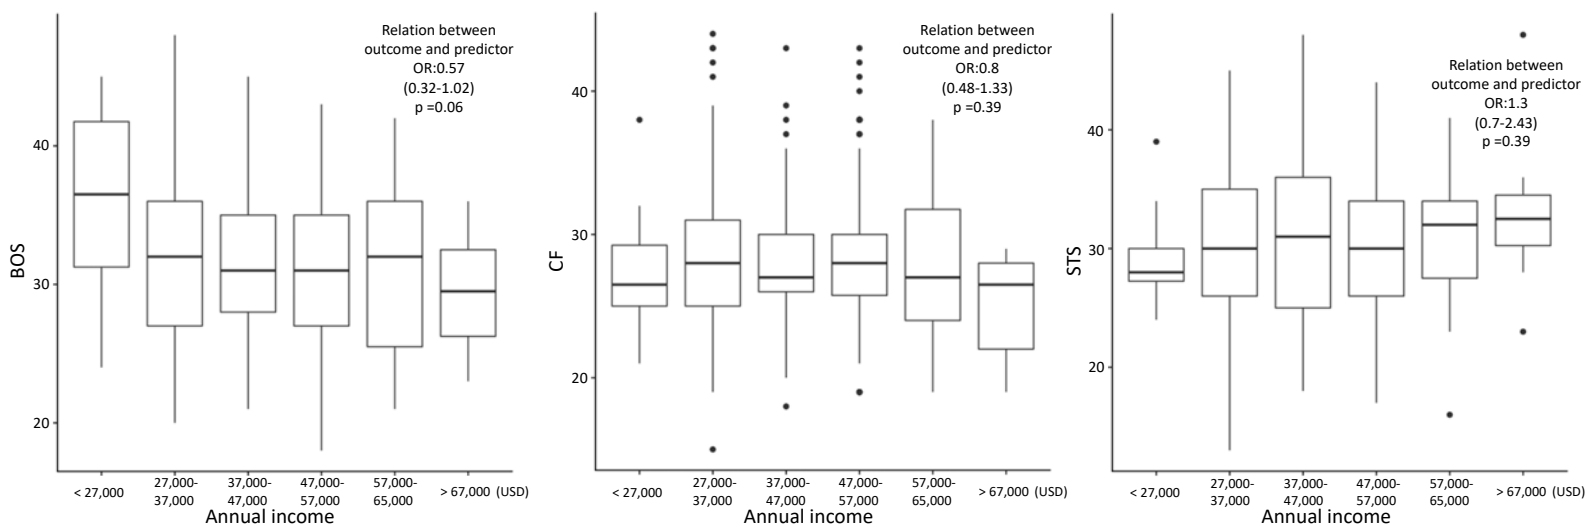

Annual income for BOS

| Reference | Factor                  | Odds ratio | 95%CI       | p-value |
|-----------|-------------------------|------------|-------------|---------|
| <27,000   | Degree of annual income | 0.57       | (0.32-1.02) | 0.06    |

Annual income for STS

| Reference | Factor                  | Odds ratio | 95%CI       | p-value |
|-----------|-------------------------|------------|-------------|---------|
| <27,000   | Degree of annual income | 0.8        | (0.48-1.33) | 0.39    |

Annual income for CS

| Reference | Factor                  | Odds ratio | 95%CI      | p-value |
|-----------|-------------------------|------------|------------|---------|
| <27,000   | Degree of annual income | 1.3        | (0.7-2.43) | 0.39    |

We categorized the annual income as follow:

Education level for BOS, STS, CS

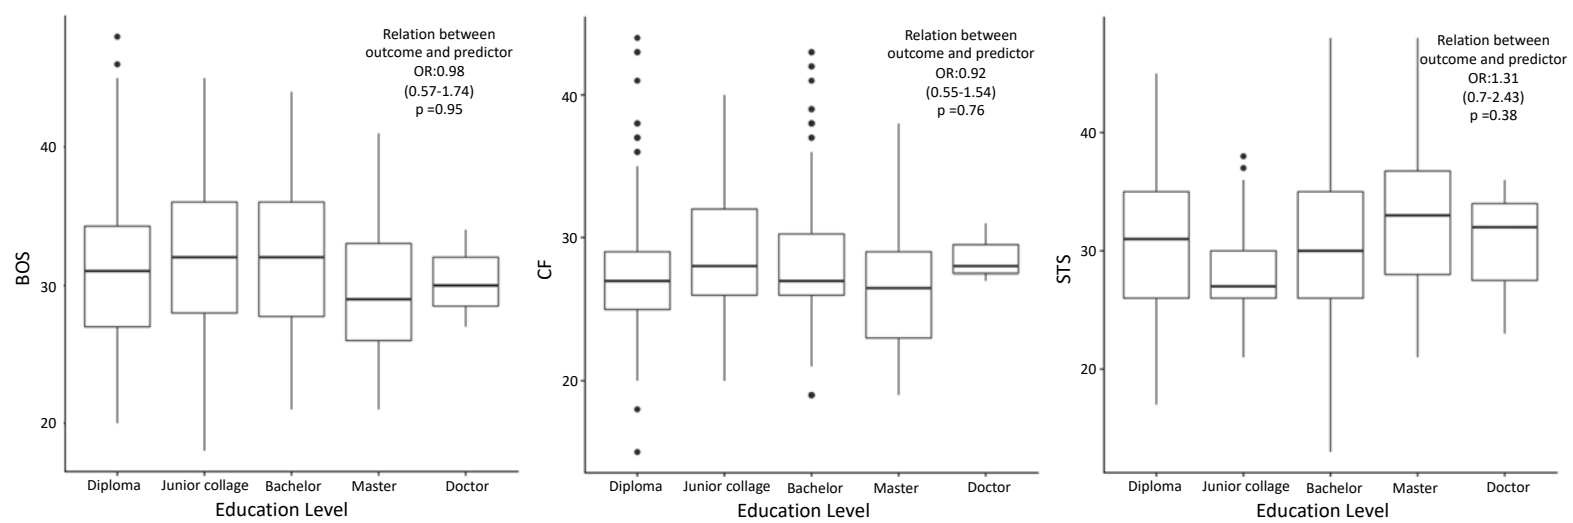

Education level for BOS

| Reference | Factor                    | Odds ratio | 95%CI       | p-value |
|-----------|---------------------------|------------|-------------|---------|
| Diploma   | Degree of education level | 0.98       | (0.57-1.74) | 0.95    |

Education level for STS

| Reference | Factor                    | Odds ratio | 95%CI       | p-value |
|-----------|---------------------------|------------|-------------|---------|
| Diploma   | Degree of education level | 0.92       | (0.55-1.54) | 0.76    |

Education level for CS

| Reference | Factor                    | Odds ratio | 95%CI      | p-value |
|-----------|---------------------------|------------|------------|---------|
| Diploma   | Degree of education level | 1.31       | (0.7-2.43) | 0.38    |

We categorized the education level as follow:

## Years of nursing experience for BOS, STS, CS

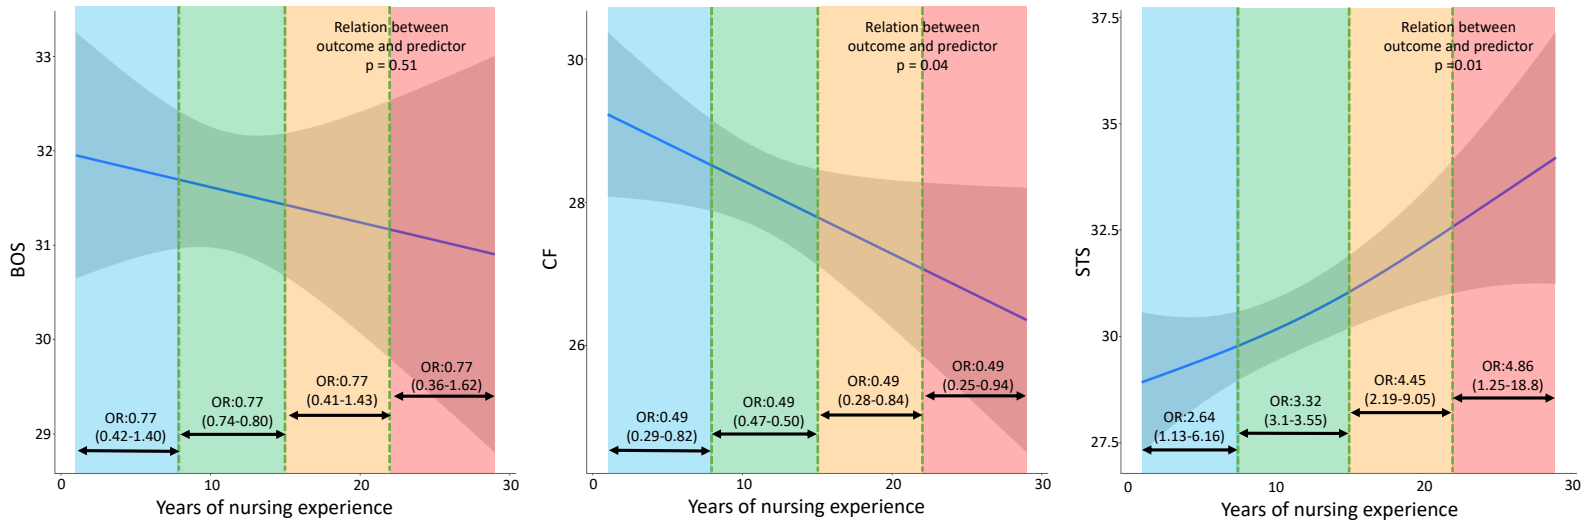

## Years of nursing experience for BOS

| Quartile                            | Range of factor | Odds ratio | 95% CI      |
|-------------------------------------|-----------------|------------|-------------|
| 0 <sup>th</sup> -25 <sup>th</sup>   | 22-30           | 0.77       | (0.42-1.40) |
| 25 <sup>th</sup> -50 <sup>th</sup>  | 30-38           | 0.77       | (0.74-0.80) |
| 50 <sup>th</sup> -75 <sup>th</sup>  | 38-45           | 0.77       | (0.41-1.43) |
| 75 <sup>th</sup> -100 <sup>th</sup> | 45-53           | 0.77       | (0.36-1.62) |

## Years of nursing experience for STS

| Quartile                            | Range of factor | Odds ratio | 95% CI      |
|-------------------------------------|-----------------|------------|-------------|
| 0 <sup>th</sup> -25 <sup>th</sup>   | 22-30           | 0.49       | (0.29-0.82) |
| 25 <sup>th</sup> -50 <sup>th</sup>  | 30-38           | 0.49       | (0.47-0.50) |
| 50 <sup>th</sup> -75 <sup>th</sup>  | 38-45           | 0.49       | (0.28-0.84) |
| 75 <sup>th</sup> -100 <sup>th</sup> | 45-53           | 0.49       | (0.25-0.94) |

## Years of nursing experience for CS

| Quartile                            | Range of factor | Odds ratio | 95% CI      |
|-------------------------------------|-----------------|------------|-------------|
| 0 <sup>th</sup> -25 <sup>th</sup>   | 22-30           | 2.64       | (1.85-6.96) |
| 25 <sup>th</sup> -50 <sup>th</sup>  | 30-38           | 3.32       | (3.36-3.83) |
| 50 <sup>th</sup> -75 <sup>th</sup>  | 38-45           | 4.45       | (2.19-9.05) |
| 75 <sup>th</sup> -100 <sup>th</sup> | 45-53           | 4.86       | (1.25-18.8) |

Years of ICU experience for BOS, STS, CS

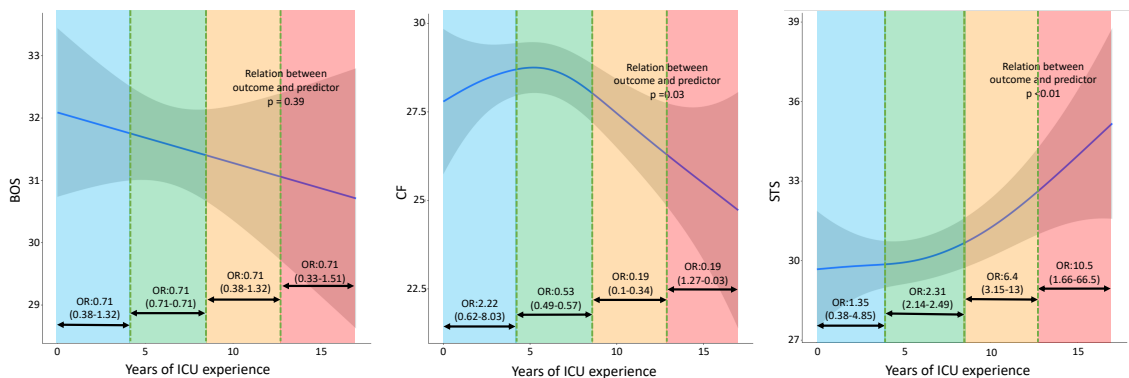

Years of ICU experience for BOS

| reference | factor | Odds ratio | 95%CI | p-value |
|-----------|--------|------------|-------|---------|
| Zero      | Years  |            |       |         |

Years of ICU experience for STS

| reference | factor | Odds ratio | 95%CI | p-value |
|-----------|--------|------------|-------|---------|
| Zero      | Years  |            |       |         |

Years of ICU experience for CS

| reference | factor | Odds ratio | 95%CI | p-value |
|-----------|--------|------------|-------|---------|
| Zero      | Years  |            |       |         |

Big five theory-Extraversion for BOS, STS, CS

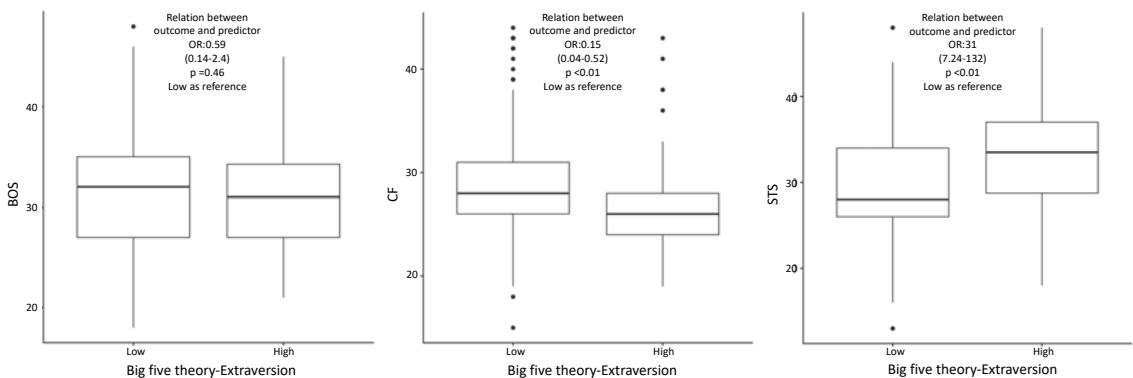

Extraversion for BOS

| refference | factor | Odds ratio | 95%CI | p-value |
|------------|--------|------------|-------|---------|
| Low        | High   |            |       |         |

Extraversion for STS

| refference | factor | Odds ratio | 95%CI | p-value |
|------------|--------|------------|-------|---------|
| Low        | High   |            |       |         |

Extraversion for CS

| refference | factor | Odds ratio | 95%CI | p-value |
|------------|--------|------------|-------|---------|
| Low        | High   |            |       |         |



Big five theory- Agreeableness for BOS, STS, CS

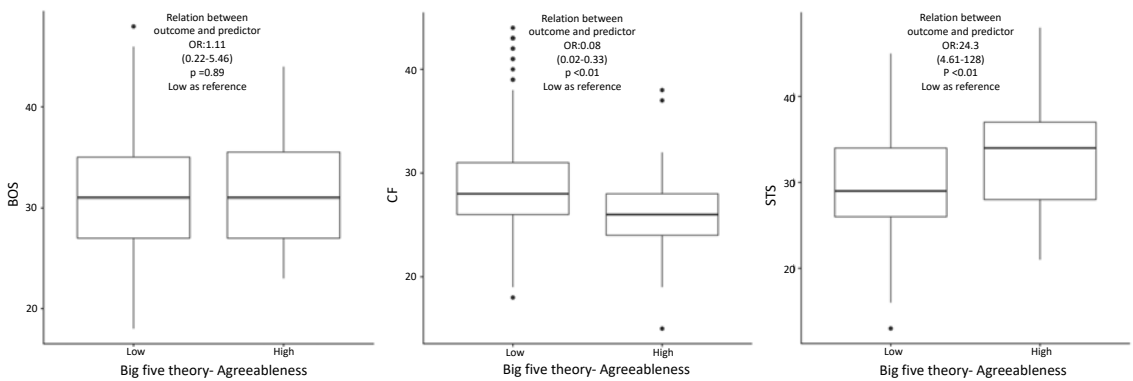

Agreeableness for BOS

| reference | factor | Odds ratio | 95%CI | p-value |
|-----------|--------|------------|-------|---------|
| Low       | High   |            |       |         |

Agreeableness for STS

| reference | factor | Odds ratio | 95%CI | p-value |
|-----------|--------|------------|-------|---------|
| Low       | High   |            |       |         |

Agreeableness for CS

| reference | factor | Odds ratio | 95%CI | p-value |
|-----------|--------|------------|-------|---------|
| Low       | High   |            |       |         |

Big five theory- Conscientiousness for BOS, STS, CS

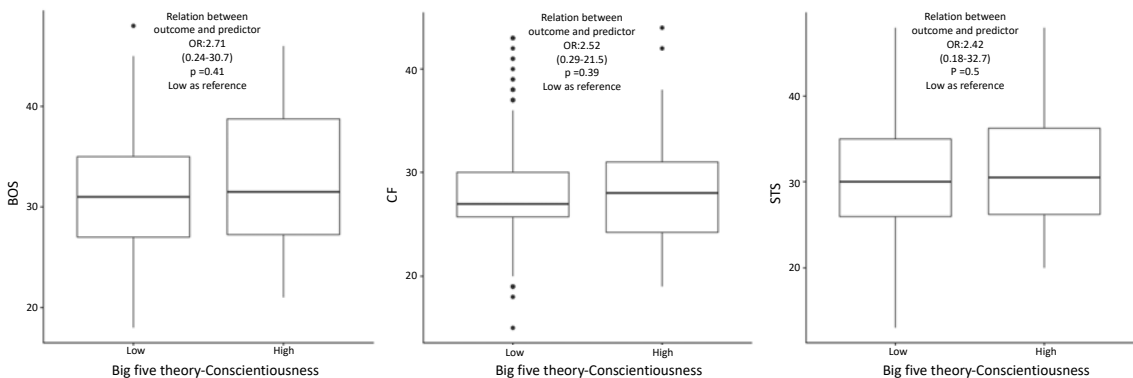

Conscientiousness for BOS

| reference | factor | Odds ratio | 95%CI | p-value |
|-----------|--------|------------|-------|---------|
| Low       | High   |            |       |         |

Conscientiousness for STS

| reference | factor | Odds ratio | 95%CI | p-value |
|-----------|--------|------------|-------|---------|
| Low       | High   |            |       |         |

Conscientiousness for CS

| reference | factor | Odds ratio | 95%CI | p-value |
|-----------|--------|------------|-------|---------|
| Low       | High   |            |       |         |

Big five theory -Neuroticism for BOS, STS, CS

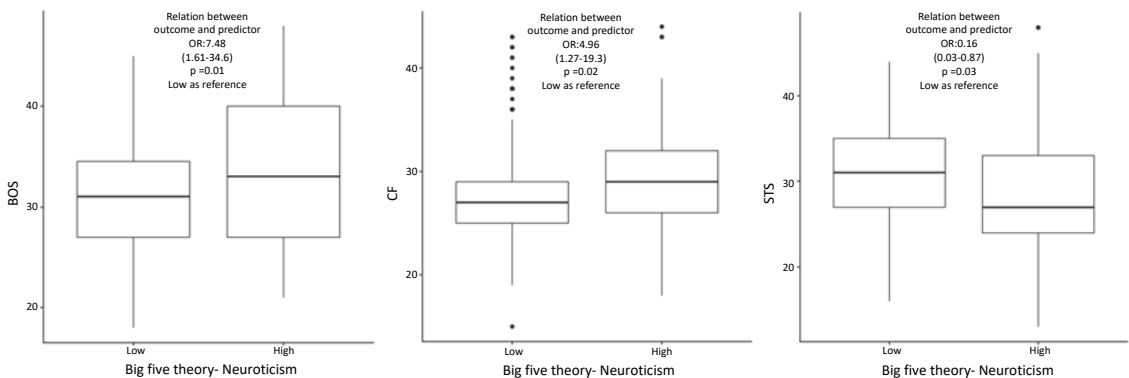

Neuroticism for BOS

| reference | factor | Odds ratio | 95%CI | p-value |
|-----------|--------|------------|-------|---------|
| Low       | High   |            |       |         |

Neuroticism for STS

| reference | factor | Odds ratio | 95%CI | p-value |
|-----------|--------|------------|-------|---------|
| Low       | High   |            |       |         |

Neuroticism for CS

| reference | factor | Odds ratio | 95%CI | p-value |
|-----------|--------|------------|-------|---------|
| Low       | High   |            |       |         |

Big five theory - Openness for BOS, STS, CS

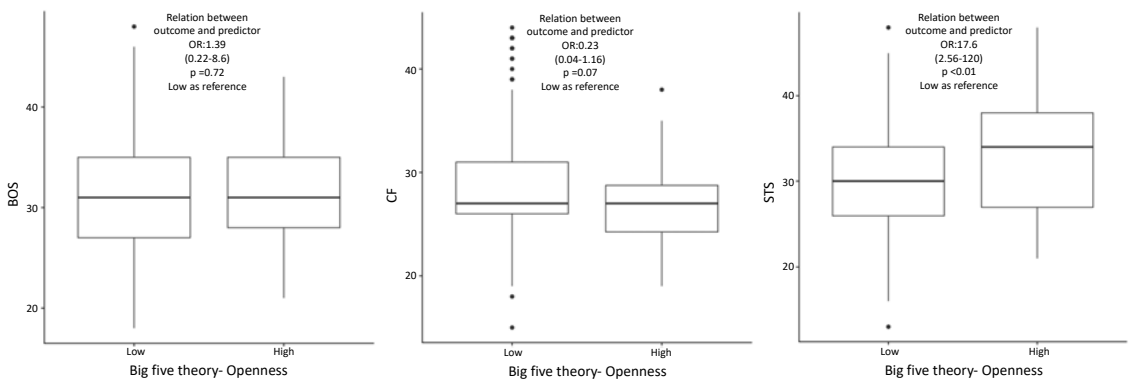

Openness for BOS

| reference | factor | Odds ratio | 95%CI | p-value |
|-----------|--------|------------|-------|---------|
| Low       | High   |            |       |         |

Openness for STS

| reference | factor | Odds ratio | 95%CI | p-value |
|-----------|--------|------------|-------|---------|
| Low       | High   |            |       |         |

Openness for CS

| reference | factor | Odds ratio | 95%CI | p-value |
|-----------|--------|------------|-------|---------|
| Low       | High   |            |       |         |

Type-D personality for BOS, STS, CS

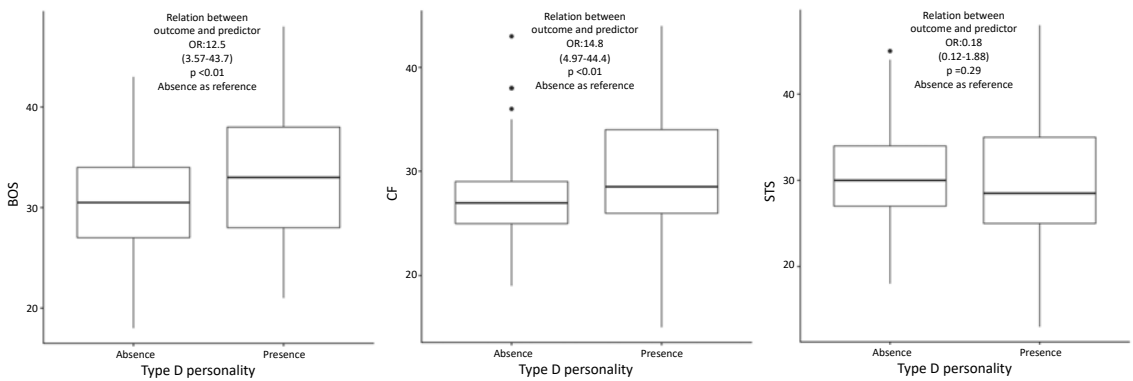

Type-D personality for BOS

| reference | factor | Odds ratio | 95%CI | p-value |
|-----------|--------|------------|-------|---------|
| Low       | High   |            |       |         |

Type-D personality for STS

| reference | factor | Odds ratio | 95%CI | p-value |
|-----------|--------|------------|-------|---------|
| Low       | High   |            |       |         |

Type-D personality for CS

| reference | factor | Odds ratio | 95%CI | p-value |
|-----------|--------|------------|-------|---------|
| Low       | High   |            |       |         |

## Type-D personality- Negative Affectivity (NA) for BOS, STS, CS

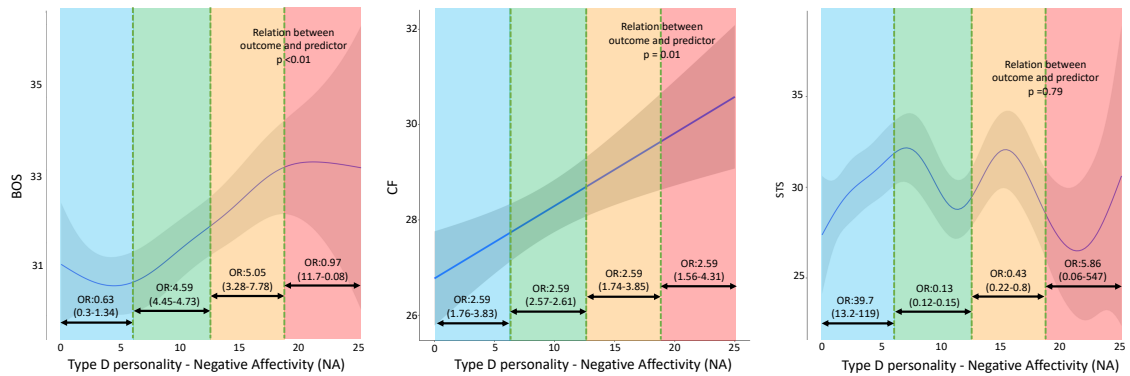

### Negative Affectivity for BOS

| Quartile                            | Range of factor | Odds ratio | 95% CI      |
|-------------------------------------|-----------------|------------|-------------|
| 0 <sup>th</sup> -25 <sup>th</sup>   |                 | 0.63       | (0.38-4.85) |
| 25 <sup>th</sup> -50 <sup>th</sup>  |                 | 4.59       | (2.14-2.49) |
| 50 <sup>th</sup> -75 <sup>th</sup>  |                 | 5.05       | (3.15-13)   |
| 75 <sup>th</sup> -100 <sup>th</sup> |                 | 0.97       | (1.66-66.5) |

GAM modeling showed positive association and p-value was  $p > 0.01$

### Negative Affectivity for STS

| Quartile                            | Range of factor | Odds ratio | 95% CI |
|-------------------------------------|-----------------|------------|--------|
| 0 <sup>th</sup> -25 <sup>th</sup>   |                 |            |        |
| 25 <sup>th</sup> -50 <sup>th</sup>  |                 |            |        |
| 50 <sup>th</sup> -75 <sup>th</sup>  |                 |            |        |
| 75 <sup>th</sup> -100 <sup>th</sup> |                 |            |        |

GAM modeling showed positive association and p-value was  $p = 0.01$

### Negative Affectivity for CS

| Quartile                            | Range of factor | Odds ratio | 95% CI      |
|-------------------------------------|-----------------|------------|-------------|
| 0 <sup>th</sup> -25 <sup>th</sup>   |                 | 39.7       | (13.2-119)  |
| 25 <sup>th</sup> -50 <sup>th</sup>  |                 | 0.13       | (0.12-0.15) |
| 50 <sup>th</sup> -75 <sup>th</sup>  |                 | 0.43       | (0.22-0.8)  |
| 75 <sup>th</sup> -100 <sup>th</sup> |                 | 5.86       | (0.06-547)  |

GAM modeling showed positive association and p-value was  $p = 0.79$

Type-D personality-Social Inhibition (SI) for BOS, STS, CS

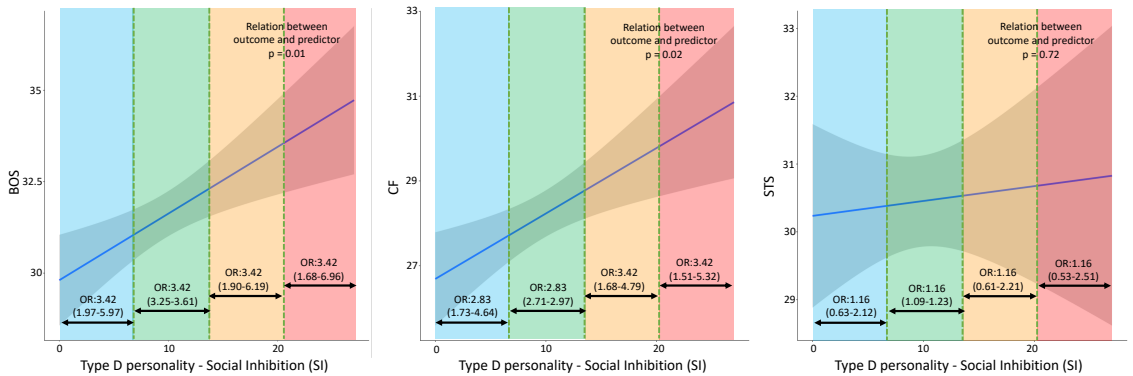

Social Inhibition for BOS

| Quartile                            | Range of factor | Odds ratio | 95% CI |
|-------------------------------------|-----------------|------------|--------|
| 0 <sup>th</sup> -25 <sup>th</sup>   |                 |            |        |
| 25 <sup>th</sup> -50 <sup>th</sup>  |                 |            |        |
| 50 <sup>th</sup> -75 <sup>th</sup>  |                 |            |        |
| 75 <sup>th</sup> -100 <sup>th</sup> |                 |            |        |

GAM modeling showed positive association and p-value was p=

Social Inhibition for STS

| Quartile                            | Range of factor | Odds ratio | 95% CI |
|-------------------------------------|-----------------|------------|--------|
| 0 <sup>th</sup> -25 <sup>th</sup>   |                 |            |        |
| 25 <sup>th</sup> -50 <sup>th</sup>  |                 |            |        |
| 50 <sup>th</sup> -75 <sup>th</sup>  |                 |            |        |
| 75 <sup>th</sup> -100 <sup>th</sup> |                 |            |        |

GAM modeling showed positive association and p-value was p=

Social Inhibition for CS

| Quartile                            | Range of factor | Odds ratio | 95% CI |
|-------------------------------------|-----------------|------------|--------|
| 0 <sup>th</sup> -25 <sup>th</sup>   |                 |            |        |
| 25 <sup>th</sup> -50 <sup>th</sup>  |                 |            |        |
| 50 <sup>th</sup> -75 <sup>th</sup>  |                 |            |        |
| 75 <sup>th</sup> -100 <sup>th</sup> |                 |            |        |

GAM modeling showed positive association and p-value was p=

HECS-Total for BOS, STS, CS

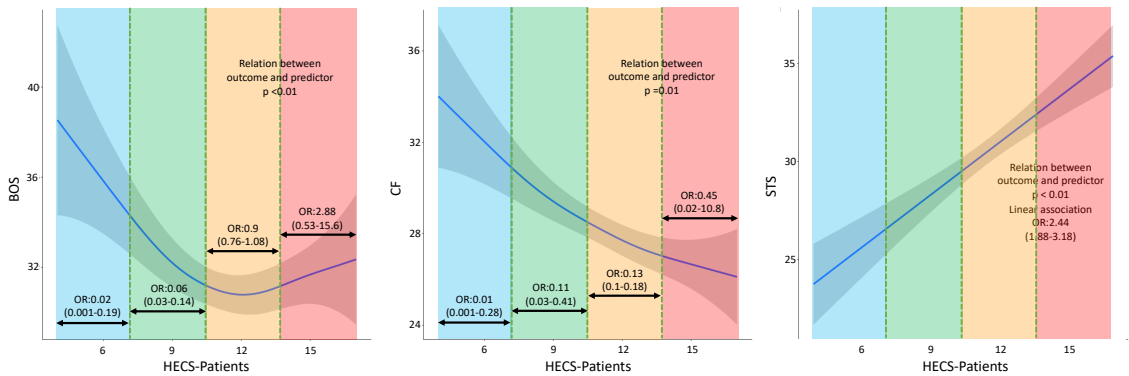

HECS-Total for BOS

| Quartile                            | Range of factor | Odds ratio | 95% CI       |
|-------------------------------------|-----------------|------------|--------------|
| 0 <sup>th</sup> -25 <sup>th</sup>   |                 | 0.005      | (0.001-0.01) |
| 25 <sup>th</sup> -50 <sup>th</sup>  |                 | 0.02       | (0.01-0.02)  |
| 50 <sup>th</sup> -75 <sup>th</sup>  |                 | 3.92       | (1.59-9.63)  |
| 75 <sup>th</sup> -100 <sup>th</sup> |                 | 0.84       | (0.03-20.5)  |

GAM modeling showed positive association and p-value was p=0.01

HECS-Total for STS

| Quartile                            | Range of factor | Odds ratio | 95% CI       |
|-------------------------------------|-----------------|------------|--------------|
| 0 <sup>th</sup> -25 <sup>th</sup>   |                 | 0.01       | (0.001-0.05) |
| 25 <sup>th</sup> -50 <sup>th</sup>  |                 | 0.02       | (0.01-0.03)  |
| 50 <sup>th</sup> -75 <sup>th</sup>  |                 | 0.16       | (0.08-0.32)  |
| 75 <sup>th</sup> -100 <sup>th</sup> |                 | 0.36       | (0.04-3.06)  |

GAM modeling showed positive association and p-value was p<0.01

HECS-Total for CS

| Quartile                            | Range of factor | Odds ratio | 95% CI |
|-------------------------------------|-----------------|------------|--------|
| 0 <sup>th</sup> -25 <sup>th</sup>   |                 |            |        |
| 25 <sup>th</sup> -50 <sup>th</sup>  |                 |            |        |
| 50 <sup>th</sup> -75 <sup>th</sup>  |                 |            |        |
| 75 <sup>th</sup> -100 <sup>th</sup> |                 |            |        |

GAM modeling showed positive association and p-value was p<0.01



HECS-Peers for BOS, STS, CS

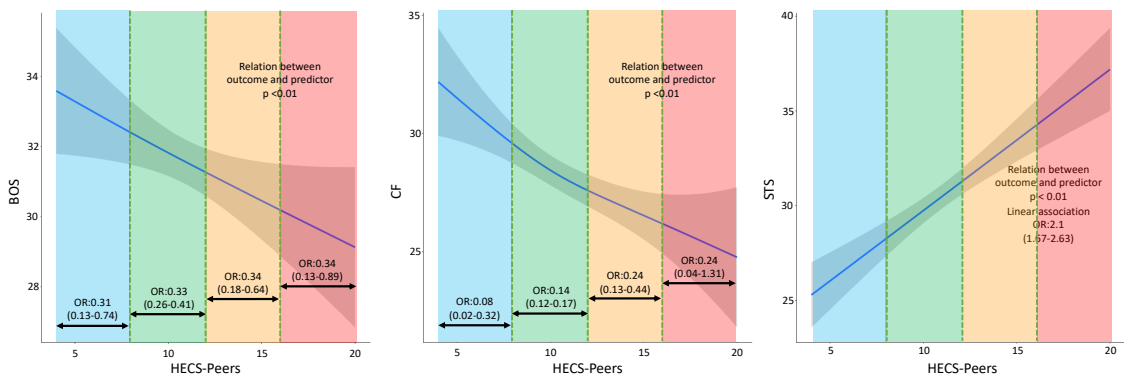

HECS-Peers for BOS

| Quartile                            | Range of factor | Odds ratio | 95% CI      |
|-------------------------------------|-----------------|------------|-------------|
| 0 <sup>th</sup> -25 <sup>th</sup>   |                 | 0.31       | (0.13-0.74) |
| 25 <sup>th</sup> -50 <sup>th</sup>  |                 | 0.33       | (0.26-0.41) |
| 50 <sup>th</sup> -75 <sup>th</sup>  |                 | 0.34       | (0.18-0.64) |
| 75 <sup>th</sup> -100 <sup>th</sup> |                 | 0.34       | (0.13-0.89) |

GAM modeling showed positive association and p-value was p<0.01

HECS-Peers for STS

| Quartile                            | Range of factor | Odds ratio | 95% CI      |
|-------------------------------------|-----------------|------------|-------------|
| 0 <sup>th</sup> -25 <sup>th</sup>   |                 | 0.08       | (0.02-0.32) |
| 25 <sup>th</sup> -50 <sup>th</sup>  |                 | 0.14       | (0.12-0.17) |
| 50 <sup>th</sup> -75 <sup>th</sup>  |                 | 0.24       | (0.13-0.44) |
| 75 <sup>th</sup> -100 <sup>th</sup> |                 | 0.24       | (0.04-1.31) |

GAM modeling showed positive association and p-value was p<0.01

HECS-Peers for CS

| Quartile                            | Range of factor | Odds ratio | 95% CI |
|-------------------------------------|-----------------|------------|--------|
| 0 <sup>th</sup> -25 <sup>th</sup>   |                 |            |        |
| 25 <sup>th</sup> -50 <sup>th</sup>  |                 |            |        |
| 50 <sup>th</sup> -75 <sup>th</sup>  |                 |            |        |
| 75 <sup>th</sup> -100 <sup>th</sup> |                 |            |        |

GAM modeling showed positive association and p-value was p=

HECS- Patients for BOS, STS, CS

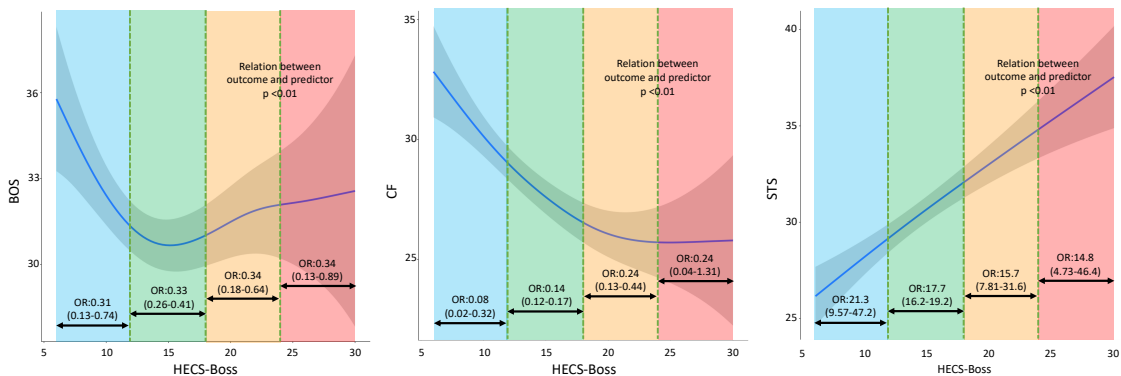

HECS- Patients for BOS

| Quartile                            | Range of factor | Odds ratio | 95% CI       |
|-------------------------------------|-----------------|------------|--------------|
| 0 <sup>th</sup> -25 <sup>th</sup>   |                 | 0.02       | (0.001-0.19) |
| 25 <sup>th</sup> -50 <sup>th</sup>  |                 | 0.06       | (0.03-0.14)  |
| 50 <sup>th</sup> -75 <sup>th</sup>  |                 | 0.9        | (0.76-1.08)  |
| 75 <sup>th</sup> -100 <sup>th</sup> |                 | 2.88       | (0.53-15.6)  |

GAM modeling showed positive association and p-value was  $p < 0.01$

HECS- Patients for STS

| Quartile                            | Range of factor | Odds ratio | 95% CI       |
|-------------------------------------|-----------------|------------|--------------|
| 0 <sup>th</sup> -25 <sup>th</sup>   |                 | 0.01       | (0.001-0.28) |
| 25 <sup>th</sup> -50 <sup>th</sup>  |                 | 0.11       | (0.03-0.41)  |
| 50 <sup>th</sup> -75 <sup>th</sup>  |                 | 0.13       | (0.1-0.18)   |
| 75 <sup>th</sup> -100 <sup>th</sup> |                 | 0.45       | (0.02-10.8)  |

GAM modeling showed positive association and p-value was  $p < 0.01$

HECS- Patients for CS

| Quartile                            | Range of factor | Odds ratio | 95% CI |
|-------------------------------------|-----------------|------------|--------|
| 0 <sup>th</sup> -25 <sup>th</sup>   |                 |            |        |
| 25 <sup>th</sup> -50 <sup>th</sup>  |                 |            |        |
| 50 <sup>th</sup> -75 <sup>th</sup>  |                 |            |        |
| 75 <sup>th</sup> -100 <sup>th</sup> |                 |            |        |

GAM modeling showed positive association and p-value was  $p =$

## HECS- Boss for BOS, STS, CS

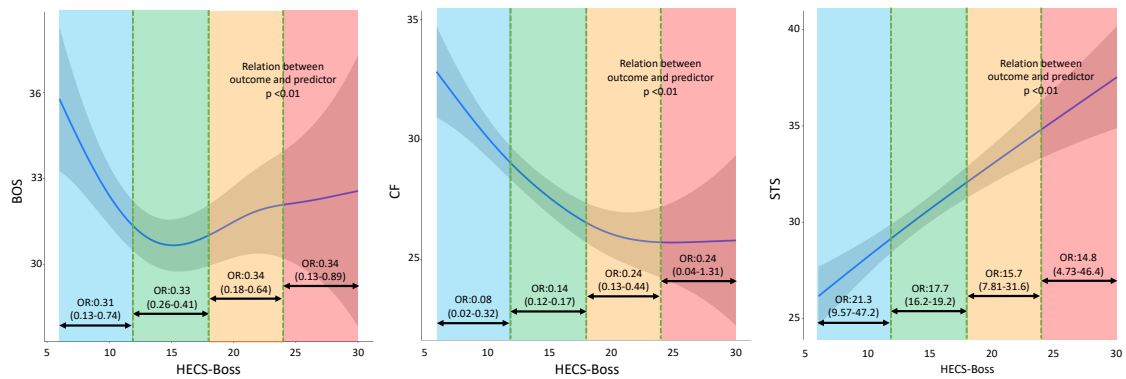

## HECS- Boss for BOS

| Quartile                            | Range of factor | Odds ratio | 95% CI      |
|-------------------------------------|-----------------|------------|-------------|
| 0 <sup>th</sup> -25 <sup>th</sup>   |                 | 0.31       | (0.13-0.74) |
| 25 <sup>th</sup> -50 <sup>th</sup>  |                 | 0.33       | (0.26-0.41) |
| 50 <sup>th</sup> -75 <sup>th</sup>  |                 | 0.34       | (0.18-0.64) |
| 75 <sup>th</sup> -100 <sup>th</sup> |                 | 0.34       | (0.13-0.89) |

GAM modeling showed positive association and p-value was  $p < 0.01$

## HECS- Boss for STS

| Quartile                            | Range of factor | Odds ratio | 95% CI      |
|-------------------------------------|-----------------|------------|-------------|
| 0 <sup>th</sup> -25 <sup>th</sup>   |                 | 0.08       | (0.02-0.32) |
| 25 <sup>th</sup> -50 <sup>th</sup>  |                 | 0.14       | (0.12-0.17) |
| 50 <sup>th</sup> -75 <sup>th</sup>  |                 | 0.24       | (0.13-0.44) |
| 75 <sup>th</sup> -100 <sup>th</sup> |                 | 0.24       | (0.04-1.31) |

GAM modeling showed positive association and p-value was  $p < 0.01$

## HECS- Boss for CS

| Quartile                            | Range of factor | Odds ratio | 95% CI      |
|-------------------------------------|-----------------|------------|-------------|
| 0 <sup>th</sup> -25 <sup>th</sup>   |                 | 21.3       | (9.57-47.2) |
| 25 <sup>th</sup> -50 <sup>th</sup>  |                 | 17.7       | (16.2-19.2) |
| 50 <sup>th</sup> -75 <sup>th</sup>  |                 | 15.7       | (7.81-31.6) |
| 75 <sup>th</sup> -100 <sup>th</sup> |                 | 14.8       | (4.73-46.4) |

GAM modeling showed positive association and p-value was  $p < 0.01$

HECS- Hospital for BOS, STS, CS

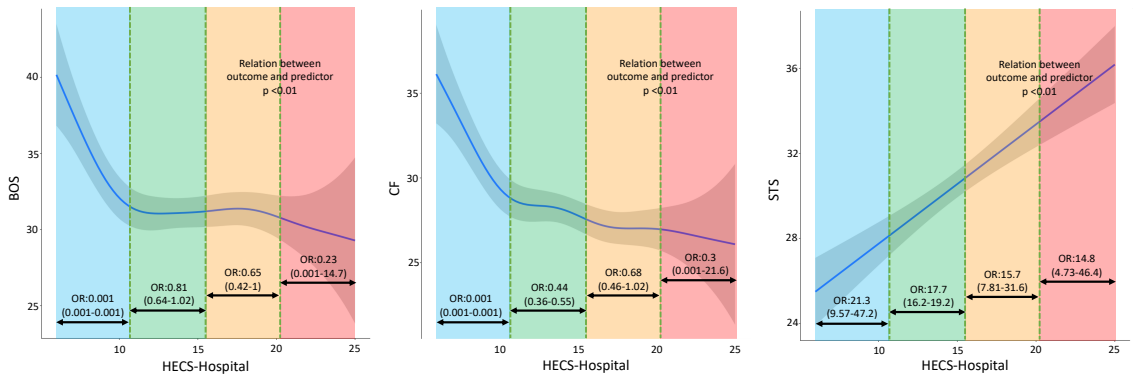

HECS- Hospital for BOS

| Quartile                            | Range of factor | Odds ratio | 95% CI        |
|-------------------------------------|-----------------|------------|---------------|
| 0 <sup>th</sup> -25 <sup>th</sup>   |                 | 0.001      | (0.001-0.001) |
| 25 <sup>th</sup> -50 <sup>th</sup>  |                 | 0.81       | (0.64-1.02)   |
| 50 <sup>th</sup> -75 <sup>th</sup>  |                 | 0.65       | (0.42-1)      |
| 75 <sup>th</sup> -100 <sup>th</sup> |                 | 0.23       | (0.001-14.7)  |

GAM modeling showed positive association and p-value was  $p < 0.01$

HECS- Hospital for STS

| Quartile                            | Range of factor | Odds ratio | 95% CI        |
|-------------------------------------|-----------------|------------|---------------|
| 0 <sup>th</sup> -25 <sup>th</sup>   |                 | 0.001      | (0.001-0.001) |
| 25 <sup>th</sup> -50 <sup>th</sup>  |                 | 0.44       | (0.36-0.55)   |
| 50 <sup>th</sup> -75 <sup>th</sup>  |                 | 0.68       | (0.46-1.02)   |
| 75 <sup>th</sup> -100 <sup>th</sup> |                 | 0.3        | (0.001-21.6)  |

GAM modeling showed positive association and p-value was  $p < 0.01$

HECS- Hospital for CS

| Quartile                            | Range of factor | Odds ratio | 95% CI |
|-------------------------------------|-----------------|------------|--------|
| 0 <sup>th</sup> -25 <sup>th</sup>   |                 |            |        |
| 25 <sup>th</sup> -50 <sup>th</sup>  |                 |            |        |
| 50 <sup>th</sup> -75 <sup>th</sup>  |                 |            |        |
| 75 <sup>th</sup> -100 <sup>th</sup> |                 |            |        |

GAM modeling showed positive association and p-value was  $p < 0.01$

HECS- Doctor for BOS, STS, CS

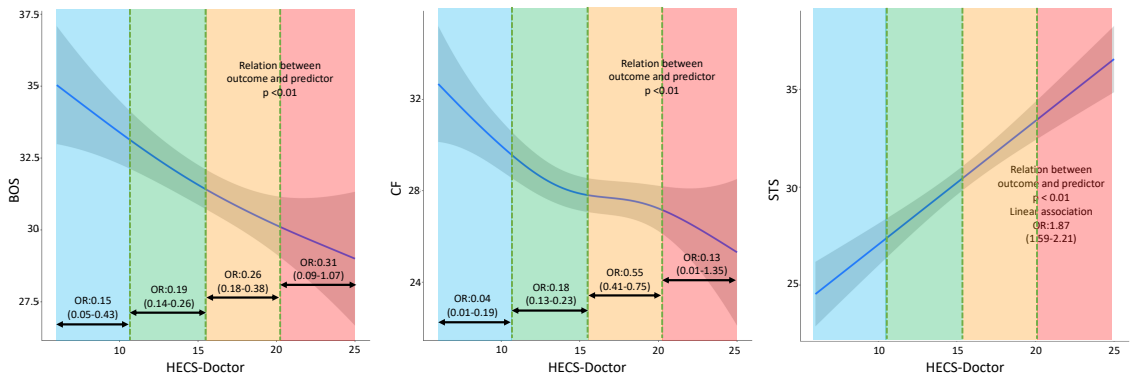

HECS- Doctor for BOS

| Quartile                            | Range of factor | Odds ratio | 95% CI      |
|-------------------------------------|-----------------|------------|-------------|
| 0 <sup>th</sup> -25 <sup>th</sup>   |                 | 0.15       | (0.05-0.43) |
| 25 <sup>th</sup> -50 <sup>th</sup>  |                 | 0.19       | (0.14-0.26) |
| 50 <sup>th</sup> -75 <sup>th</sup>  |                 | 0.26       | (0.18-0.38) |
| 75 <sup>th</sup> -100 <sup>th</sup> |                 | 0.31       | (0.09-1.07) |

GAM modeling showed positive association and p-value was  $p < 0.01$

HECS- Doctor for STS

| Quartile                            | Range of factor | Odds ratio | 95% CI      |
|-------------------------------------|-----------------|------------|-------------|
| 0 <sup>th</sup> -25 <sup>th</sup>   |                 | 0.04       | (0.01-0.19) |
| 25 <sup>th</sup> -50 <sup>th</sup>  |                 | 0.18       | (0.13-0.23) |
| 50 <sup>th</sup> -75 <sup>th</sup>  |                 | 0.55       | (0.41-0.75) |
| 75 <sup>th</sup> -100 <sup>th</sup> |                 | 0.13       | (0.01-1.35) |

GAM modeling showed positive association and p-value was  $p < 0.01$

HECS- Doctor for CS

| Quartile                            | Range of factor | Odds ratio | 95% CI |
|-------------------------------------|-----------------|------------|--------|
| 0 <sup>th</sup> -25 <sup>th</sup>   |                 |            |        |
| 25 <sup>th</sup> -50 <sup>th</sup>  |                 |            |        |
| 50 <sup>th</sup> -75 <sup>th</sup>  |                 |            |        |
| 75 <sup>th</sup> -100 <sup>th</sup> |                 |            |        |

GAM modeling showed positive association and p-value was  $p < 0.01$
