# Supplementary material for: PERSonality, Ehical, and PROfessional Quality of Life in Pediatric/Adult Intensive Nurses Study: PERSEPRO PAIN Study
Source: Research Square preprint supplement (doi:10.21203/rs.3.rs-144202/v1), 2021-01-15
Supplement: Supplementary file 2 [file de6f79f8c36163bf85765a59.pdf]

Online Data Supplement 3: Result of Interaction between ethical climate and personal traits for BOS, STS and CS

Title: PERSONALITY, Ethical, and PROFESSIONAL quality of life in Pediatric/Adult Intensive nurses study: PERSEPRO PAIN study

Running title: PERSEPRO PAIN study

## Interaction between ethical climate and extraversion for BOS, STS and CS

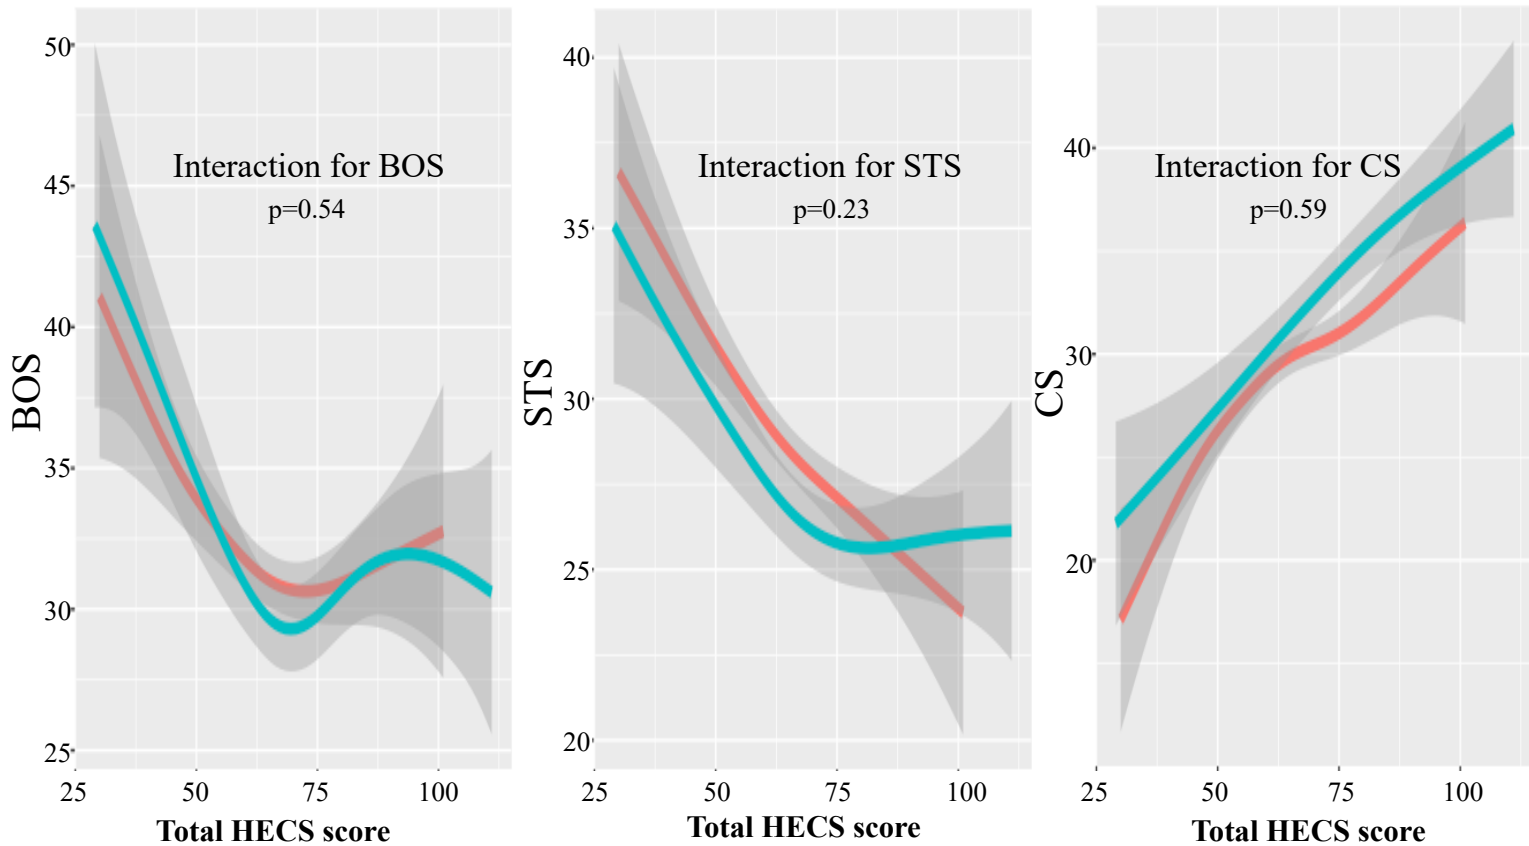

p-value was obtained by GAM modeling. We used age, sex, marital status, children, exercise habit and years of ICU experience as co-variables.

### Demographic table

|     | Absent extraversion |      | Present extraversion |      | p-value* |
|-----|---------------------|------|----------------------|------|----------|
|     | N=226               |      | N=84                 |      |          |
|     | Average             | SE   | Average              | SE   |          |
| BOS | 31.71               | 5.73 | 31.19                | 5.26 | 0.46     |
| STS | 28.69               | 5.09 | 26.82                | 4.32 | <0.01    |
| CS  | 29.52               | 5.48 | 32.95                | 6.66 | <0.01    |

\*p-value was obtained by t-test.

BOS: Burnout syndrome, CS: compassion satisfaction, STS: secondary traumatic stress  
 We applied the original cutoff point for four subjective degrees ("Low", "Medium Low", "Medium High", "High") for each personality trait but treated them as dichotomous (low and medium low as low, medium high and high as high).

### Interaction between ethical climate and agreeableness for BOS, STS and CS

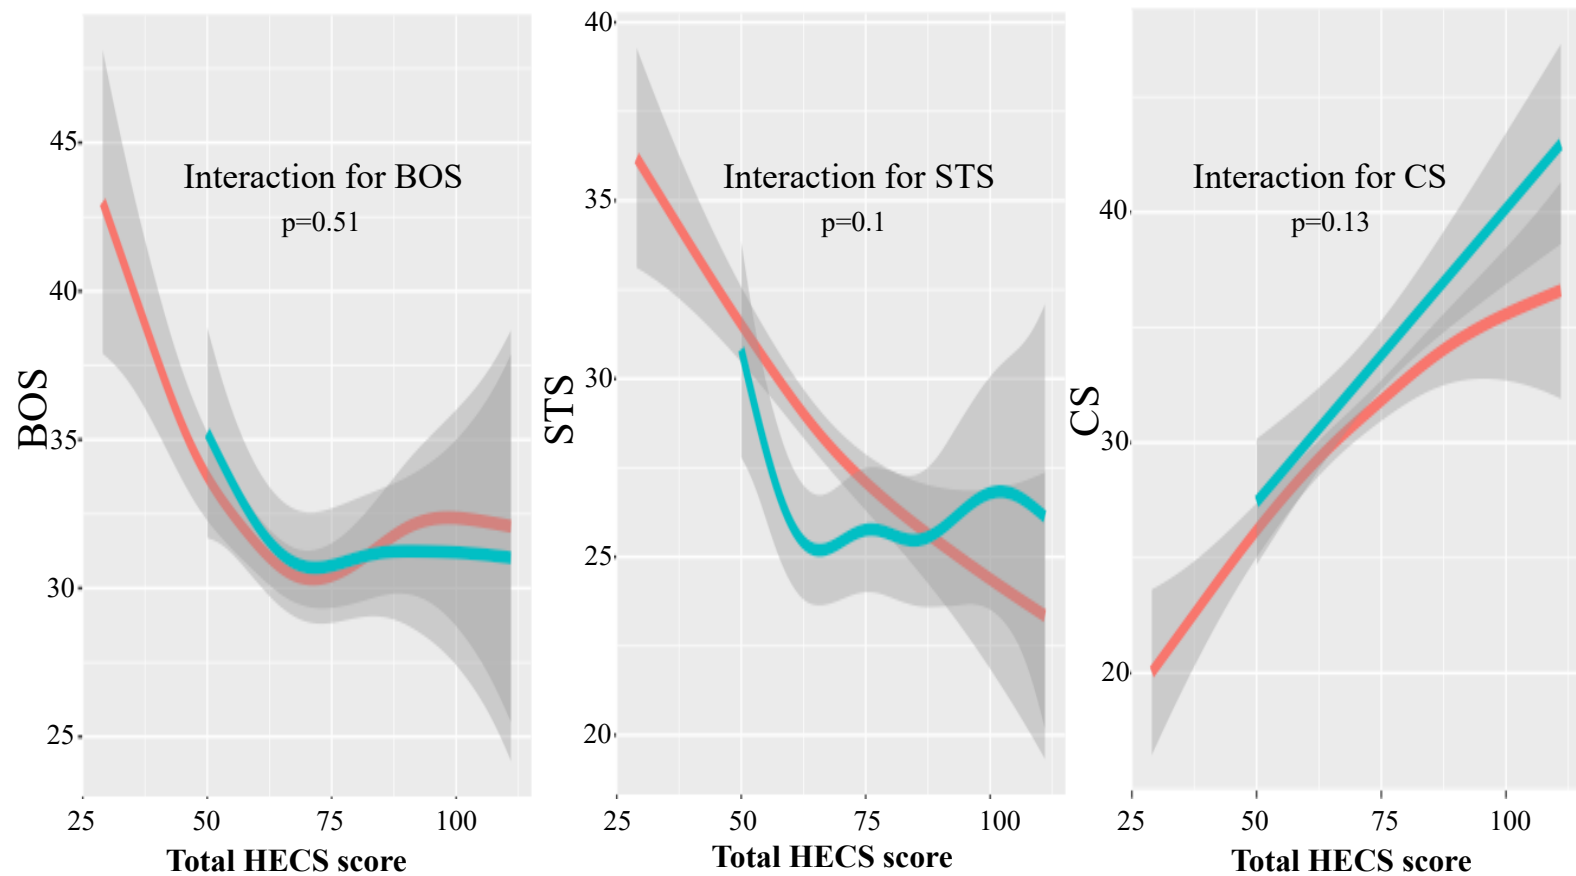

p-value was obtained by GAM modeling. We used age, sex, marital status, children, exercise habit and years of ICU experience as co-variables.

#### Demographic table

|     | Absent Agreeableness |      | Present Agreeableness |      | p-value* |
|-----|----------------------|------|-----------------------|------|----------|
|     | N=251                |      | N=59                  |      |          |
|     | Average              | SE   | Average               | SE   |          |
| BOS | 31.55                | 5.68 | 31.66                 | 5.31 | 0.89     |
| STS | 28.65                | 5.03 | 26.19                 | 4.12 | <0.01    |
| CS  | 29.84                | 5.67 | 33.03                 | 6.75 | <0.01    |

\*p-value was obtained by t-test.

BOS: Burnout syndrome, CS: compassion satisfaction, STS: secondary traumatic stress  
 We applied the original cutoff point for four subjective degrees ("Low", "Medium Low", "Medium High", "High") for each personality trait but treated them as dichotomous (low and medium low as low, medium high and high as high).

## Interaction between ethical climate and conscientiousness for BOS, STS and CS

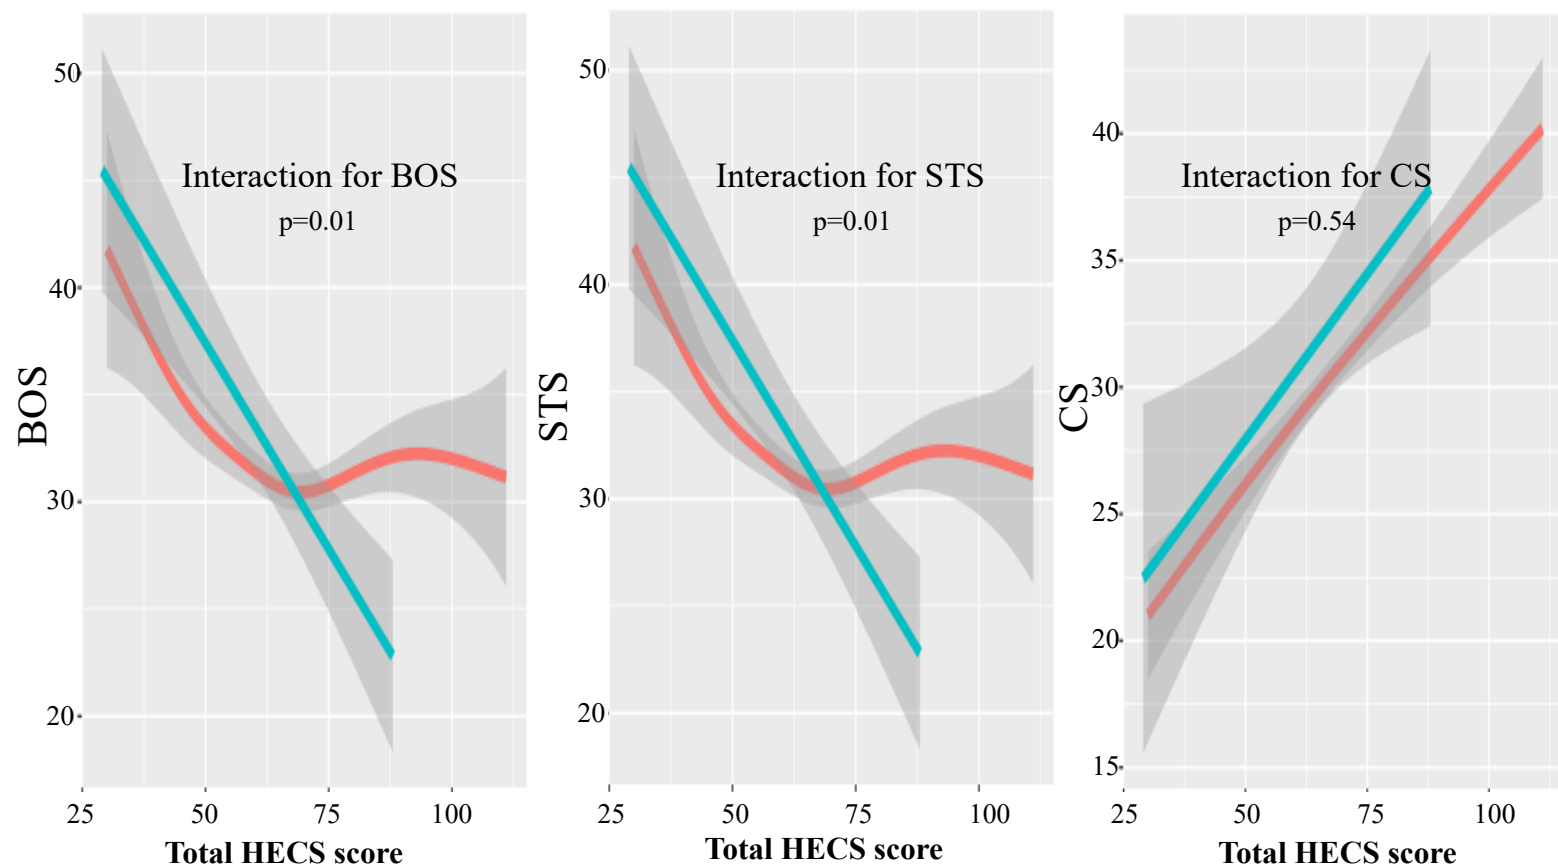

p-value was obtained by GAM modeling. We used age, sex, marital status, children, exercise habit and years of ICU experience as co-variables.

### Demographic table

|     | Absent conscientiousness |      | Present conscientiousness |      |          |
|-----|--------------------------|------|---------------------------|------|----------|
|     | N=288                    |      | N=22                      |      |          |
|     | Average                  | SE   | Average                   | SE   | p-value* |
| BOS | 31.5                     | 5.42 | 32.5                      | 7.68 | 0.55     |
| STS | 28.12                    | 4.78 | 29.05                     | 6.97 | 0.54     |
| CS  | 30.39                    | 5.9  | 31.27                     | 7.39 | 0.5      |

\*p-value was obtained by t-test.

BOS: Burnout syndrome, CS: compassion satisfaction, STS: secondary traumatic stress  
 We applied the original cutoff point for four subjective degrees ("Low", "Medium Low", "Medium High", "High") for each personality trait but treated them as dichotomous (low and medium low as low, medium high and high as high).

## Interaction between ethical climate and neuroticism for BOS, STS and CS

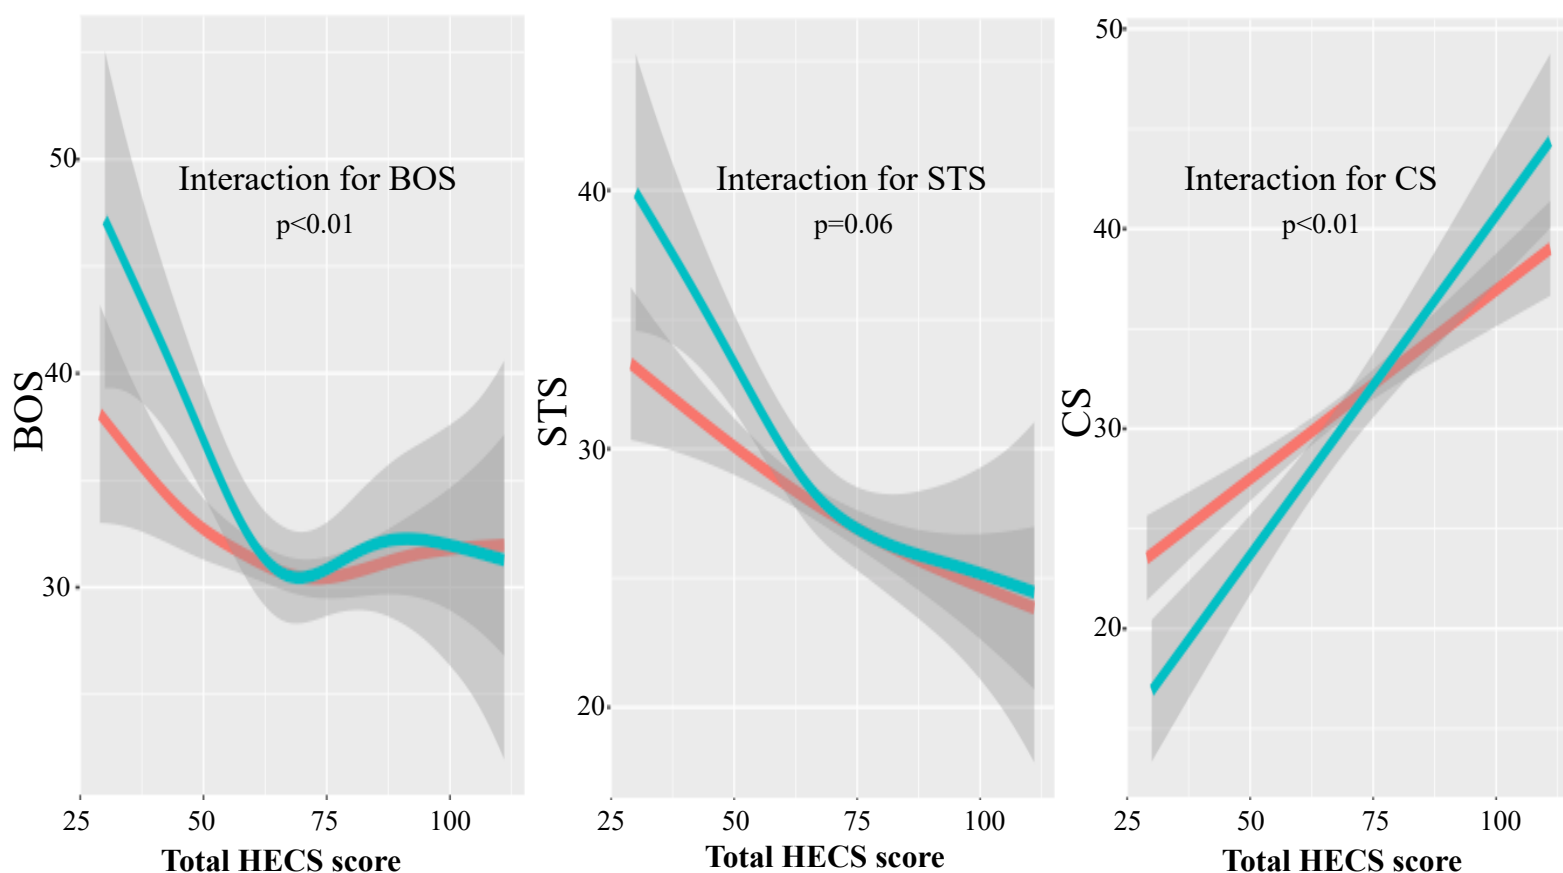

p-value was obtained by GAM modeling. We used age, sex, marital status, children, exercise habit and years of ICU experience as co-variables.

### Demographic table

|     | Absent neuroticism |      | Present neuroticism |      | p-value* |
|-----|--------------------|------|---------------------|------|----------|
|     | N=247              |      | N=63                |      |          |
|     | Average            | SE   | Average             | SE   |          |
| BOS | 31.16              | 5.15 | 33.17               | 6.91 | 0.01     |
| STS | 27.86              | 4.69 | 29.46               | 5.76 | 0.02     |
| CS  | 30.81              | 5.52 | 29.03               | 7.5  | 0.03     |

\*p-value was obtained by t-test.

BOS: Burnout syndrome, CS: compassion satisfaction, STS: secondary traumatic stress  
 We applied the original cutoff point for four subjective degrees ("Low", "Medium Low", "Medium High", "High") for each personality trait but treated them as dichotomous (low and medium low as low, medium high and high as high).

### Interaction between ethical climate and openness for BOS, STS and CS

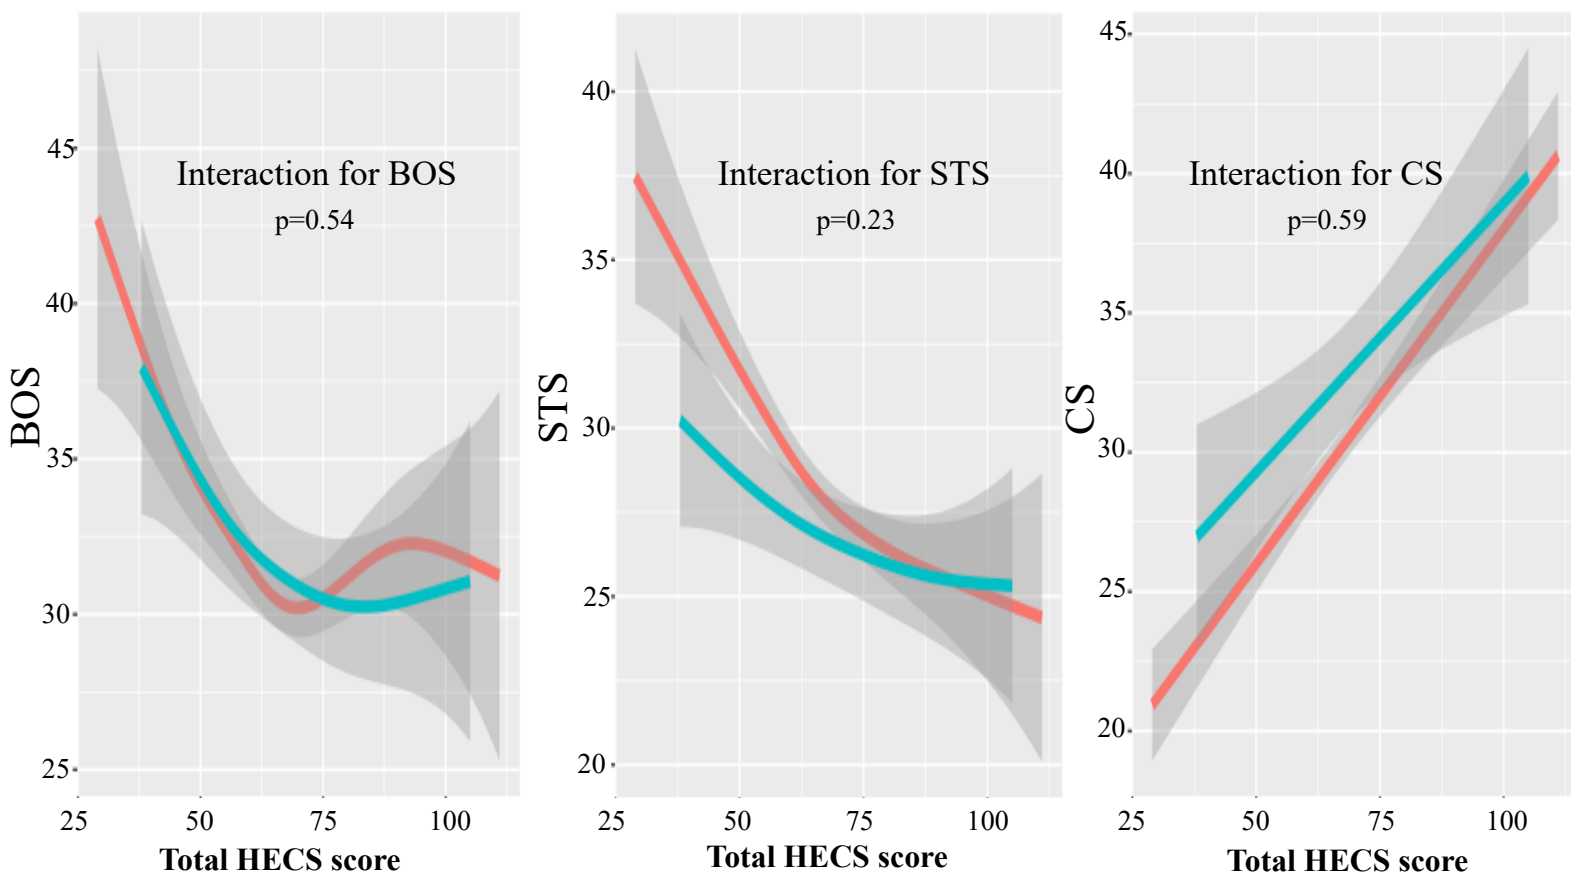

p-value was obtained by GAM modeling. We used age, sex, marital status, children, exercise habit and years of ICU experience as co-variables.

### Demographic table

|     | Absent openness |      | Present openness |      | p-value* |
|-----|-----------------|------|------------------|------|----------|
|     | N=268           |      | N=42             |      |          |
|     | Average         | SE   | Average          | SE   |          |
| BOS | 31.53           | 5.68 | 31.86            | 5.17 | 0.7      |
| STS | 28.38           | 5.09 | 26.93            | 3.79 | 0.03     |
| CS  | 30.06           | 5.81 | 32.93            | 6.69 | <0.01    |

\*p-value was obtained by t-test.

BOS: Burnout syndrome, CS: compassion satisfaction, STS: secondary traumatic stress  
 We applied the original cutoff point for four subjective degrees ("Low", "Medium Low", "Medium High", "High") for each personality trait but treated them as dichotomous (low and medium low as low, medium high and high as high).

## Interaction between ethical climate and Type D personality for BOS, STS and CS

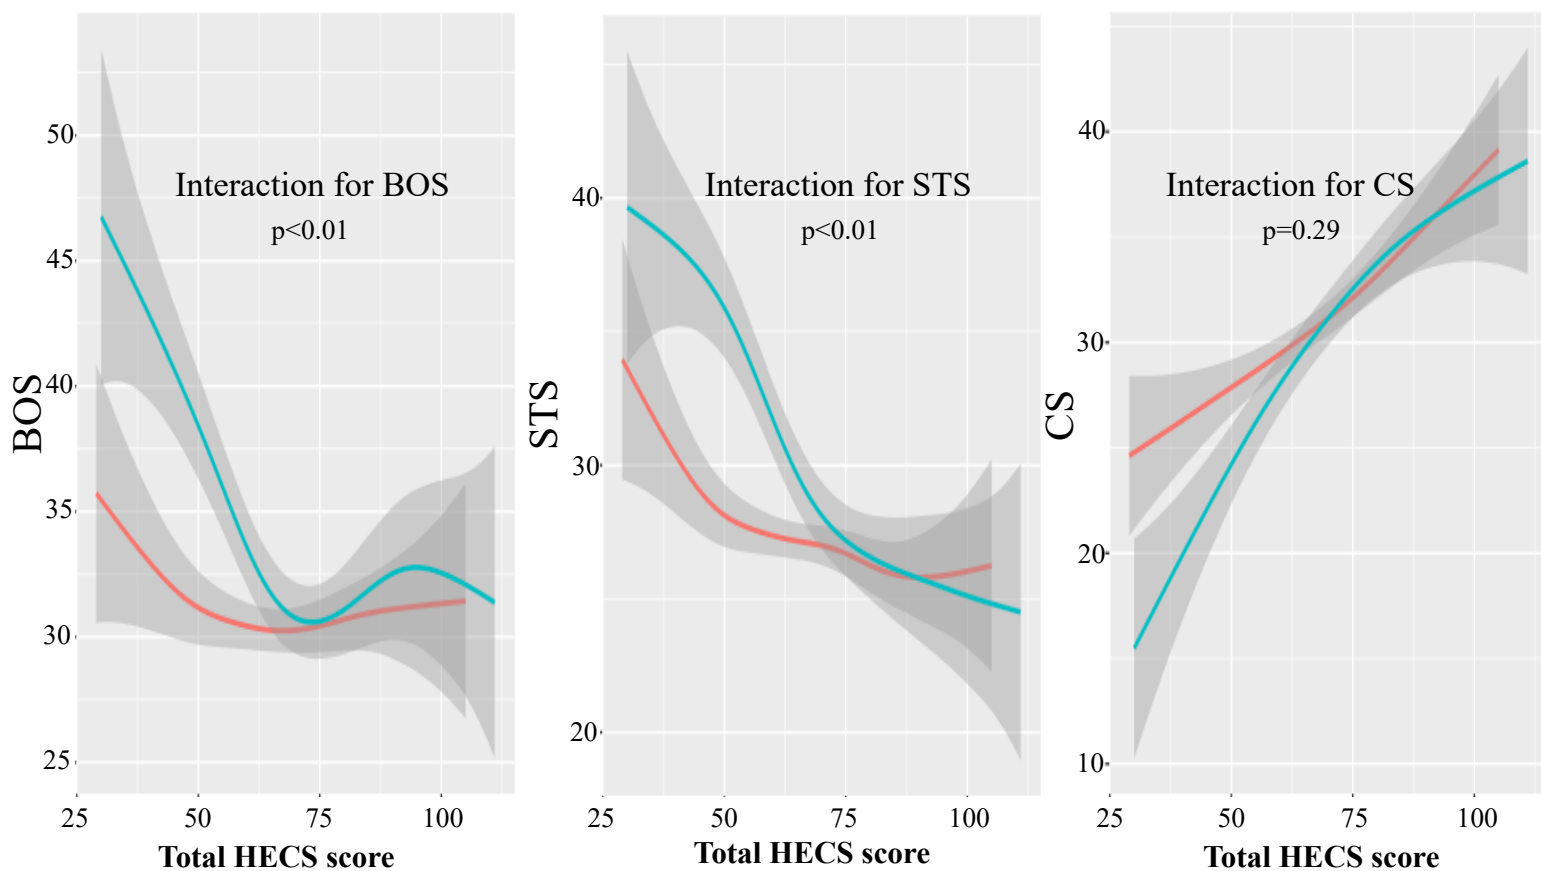

p-value was obtained by GAM modeling. We used age, sex, marital status, children, exercise habit and years of ICU experience as co-variables.

### Demographic table

|     | Absent Type D personality |      | Present Type D personality |      | p-value* |
|-----|---------------------------|------|----------------------------|------|----------|
|     | N=118                     |      | N=192                      |      |          |
|     | Average                   | SE   | Average                    | SE   |          |
| BOS | 30.61                     | 4.87 | 33.14                      | 6.35 | <0.01    |
| STS | 27.16                     | 3.71 | 29.86                      | 6.16 | <0.01    |
| CS  | 30.73                     | 5.22 | 29.99                      | 7.06 | 0.32     |

\*p-value was obtained by t-test.

BOS: Burnout syndrome, CS: compassion satisfaction, STS: secondary traumatic stress
